# Supplementary material for: Enhancing the durability of aluminium-foil anodes in rechargeable lithium batteries via uniformly distributed alloy addition in the matrix phase
Source: Royal Society of Chemistry journal article supplement (doi:10.1039/d4ta07956f), 2025-01-01
Supplement: d4ta07956f1.pdf [file d4ta07956f1.pdf]

Supplementary Information for

# Enhancing the durability of aluminium-foil anodes in rechargeable lithium batteries via uniformly distributed alloy addition in the matrix phase

*Hongyi Li,<sup>\*a</sup> Shohei Nishimura,<sup>a</sup> Weiqi Liu,<sup>a</sup> Norihiko L. Okamoto,<sup>a</sup> Shingo Matsumoto,<sup>b</sup>*

*Yuki Nakata,<sup>b</sup> Hiroaki Hoshikawa,<sup>c</sup> Toshiaki Kumagai,<sup>c</sup> Takitaro Yamaguchi<sup>b</sup> and Tetsu*

*Ichitsubo<sup>\*a</sup>*

<sup>a</sup> Institute for Materials Research, Tohoku University, Sendai 980-8577, Japan

<sup>b</sup> Advanced Materials Development Laboratory, Sumitomo Chemical Co., Ltd., Tsukuba 300-3294, Japan

<sup>c</sup> ICT & Mobility Solutions Research Laboratory, Sumitomo Chemical Co., Ltd., Ehime 792-8521, Japan

\* Email: [li.hongyi@tohoku.ac.jp](mailto:li.hongyi@tohoku.ac.jp); [tichi@tohoku.ac.jp](mailto:tichi@tohoku.ac.jp)

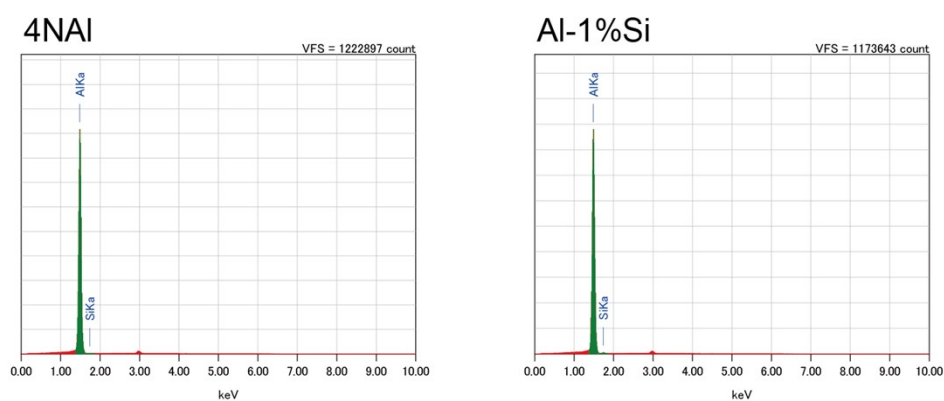

**Figure S1.** EDX spectra of 4NAI and Al-1%Si corresponding to Figure 1. EDX peak of Si was not observed in 4NAI.

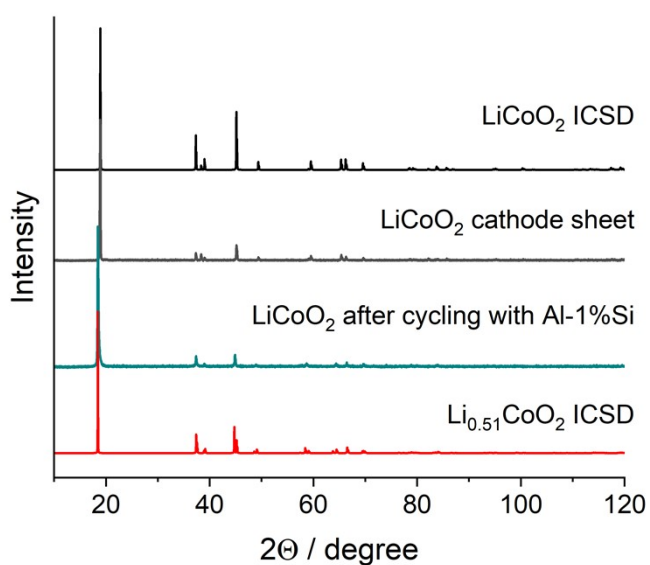

**Figure S2.** XRD of LiCoO<sub>2</sub> cathode after cycling with Al-1%Si corresponding to Figure 2. The LiCoO<sub>2</sub> after 120 cycles showed a similar XRD pattern with Li<sub>0.51</sub>CoO<sub>2</sub> without significant structure degradation.

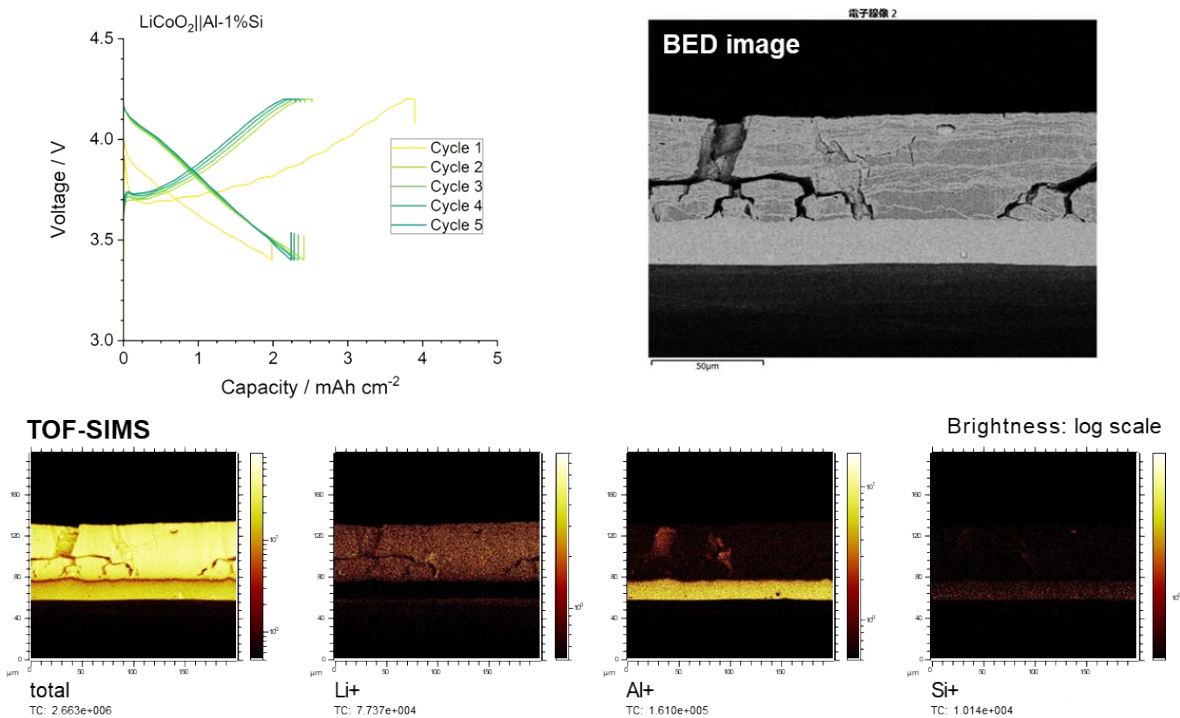

**Figure S3.** Element mapping by time-of-flight secondary ion mass spectrometry (TOF-SIMS) on an Al-1%Si foil anode after 5 cycles in a LiCoO<sub>2</sub>||Al-1%Si cell. Part of the inserted Li atoms were kinetically trapped in the surface layer.

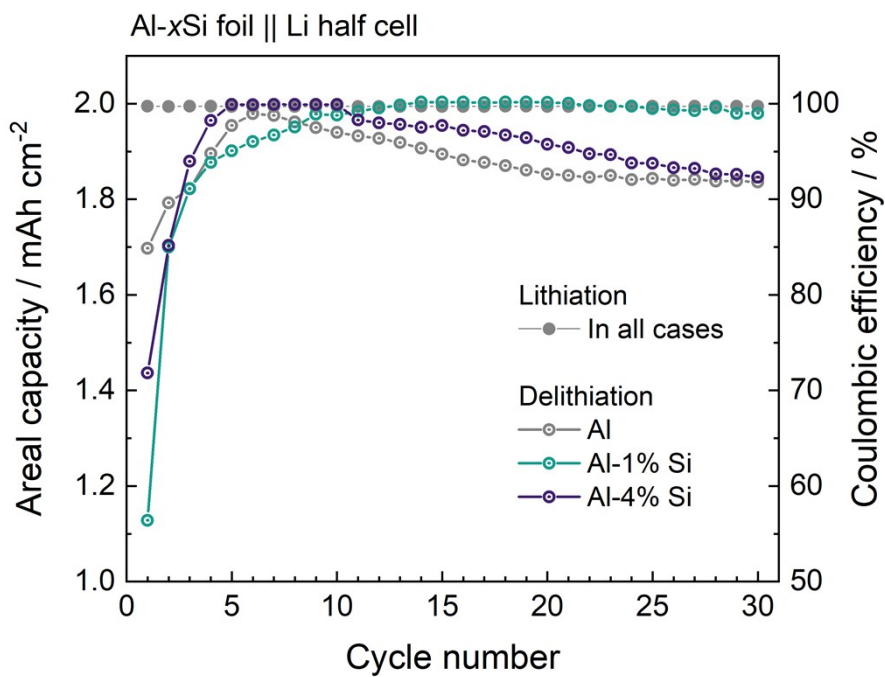

**Figure S4.** Capacity retention of Al-xSi||Li half cells corresponding to Figure 3.

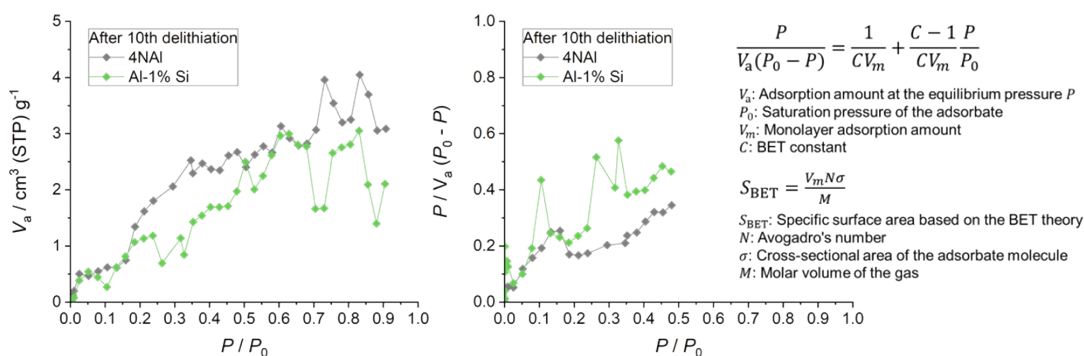

**Figure S5.** Nitrogen adsorption measurements on 4NAI and Al-1%Si foil after the 10<sup>th</sup> delithiation in half cells with a Li counter electrode. The results correspond to the samples shown in Figure S6 at the current density of 1 mA cm<sup>-2</sup>. The adsorption profiles qualitatively show that the Al-1%Si foil had a relatively low surface area compared to 4NAI, which is consistent with the morphology changes observed in the SEM images. However, due to the fluctuation of the data, it was technically difficult to obtain valid curve fitting results to quantitatively estimate the surface area based on the BET theory. The fluctuation of the measured data would be attributed to the limited amount of sample resulting in a low amount of gas absorption.

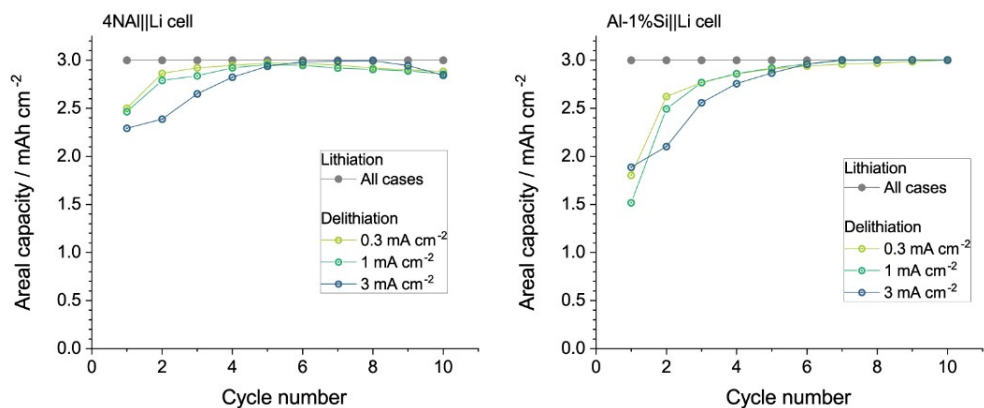

4NAI||Li cell, after 10th delithiation

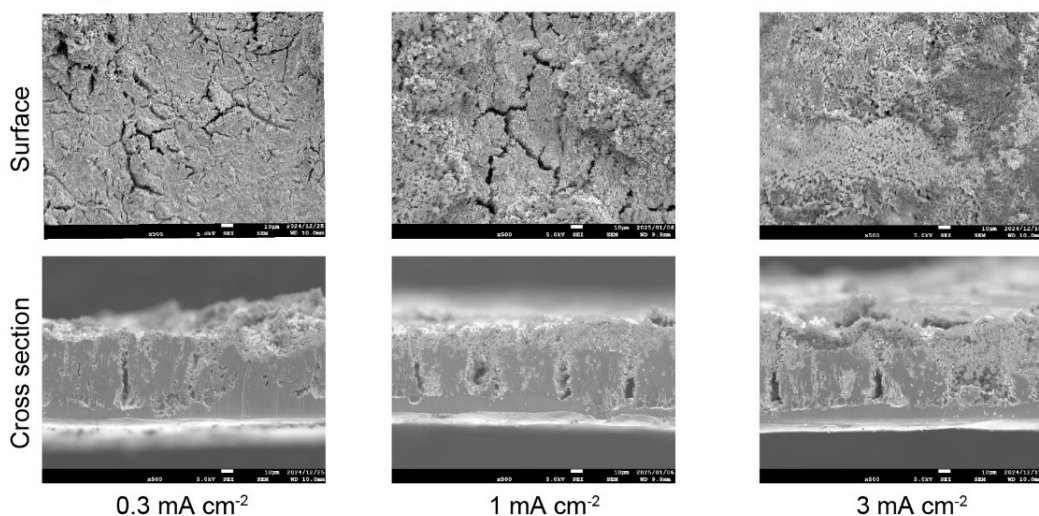

Al-1%Si||Li cell, after 10th delithiation

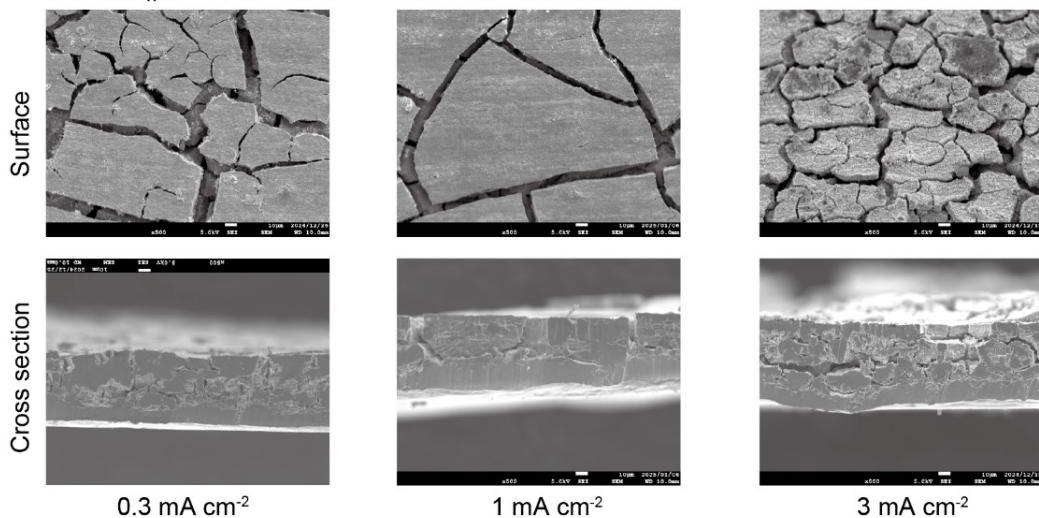

**Figure S6.** Effects of C-rate on morphology and capacity retention. The irreversible capacity loss in the early cycles increased as increasing the current density, which would be attributed to insufficient Li extraction at higher current densities. In addition, the Al grains in the surface layer become finer as the current density increases. The rapid Li extraction may cause larger stress between the Al grains, accelerating the pulverization during cycling.

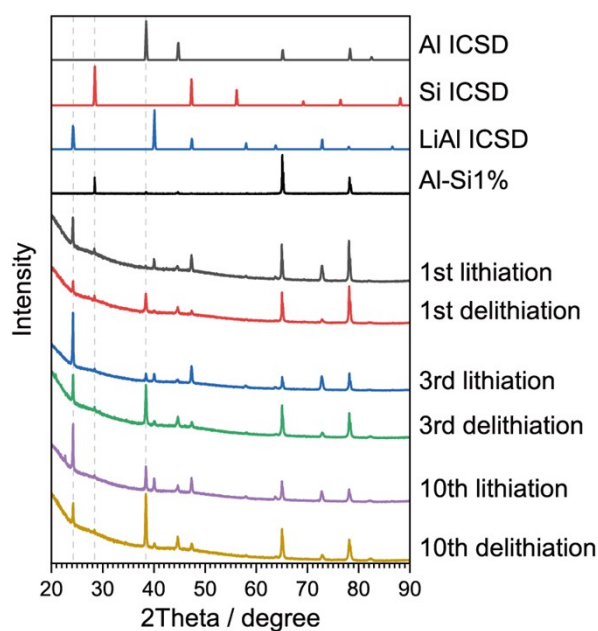

**Figure S7.** XRD of Al-1Si% after cycling in Al-1%Si||Li half cells corresponding to Figure 3.

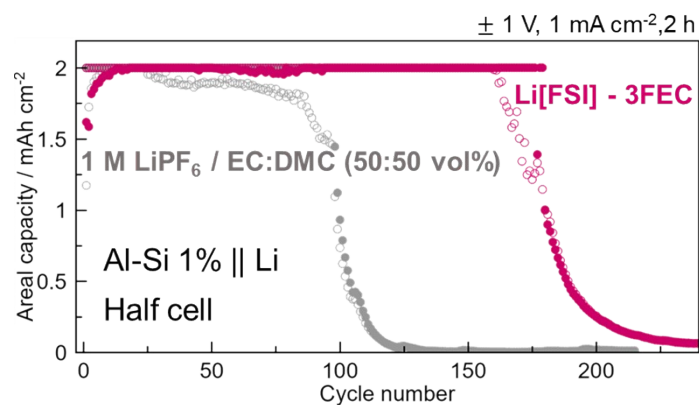

**Figure S8.** Comparison of cycle tests Al-1%Si||Li half cells with 1 M LiPF<sub>6</sub>/EC-DMC and Li[FSI]-3FEC electrolytes. The cycle life of Al-1%Si has doubled just by changing the electrolyte.

**Table S1.** Theoretical capacity of the Al-xSi foil anodes.

|           | Theoretical specific capacity / mAh g <sup>-1</sup> |         |        |
|-----------|-----------------------------------------------------|---------|--------|
|           | Total                                               | Al      | Si     |
| Al        | 993                                                 | 993     | 0      |
| Al-Si0.6% | 1008.516                                            | 987.042 | 21.474 |
| Al-Si1%   | 1018.86                                             | 983.07  | 35.79  |
| Al-Si2%   | 1044.72                                             | 973.14  | 71.58  |
| Al-Si4%   | 1096.44                                             | 953.28  | 143.16 |

The specific capacities were calculated with respect to the following lithiation reactions:  $\text{Li}^+ + e^- + \text{Al} = \text{LiAl}$  (~0.38 V vs Li) and  $15\text{Li}^+ + 15e^- + 4\text{Si} = \text{Li}_{15}\text{Si}_4$  (~0.4 V vs Li).<sup>[1]</sup>

[1] M. N. Obrovac, V. L. Chevrier, *Chem Rev* 2014, 114, 11444.

**Table S2.** Electromotive force of compounds in Li-Al-Si ternary system.

|          | Phase                            | Formation energy / eV<br>atom <sup>-1</sup> | Material ID in the<br>Materials Project | Electromotive force / V |
|----------|----------------------------------|---------------------------------------------|-----------------------------------------|-------------------------|
| Li-Al    | LiAl                             | -3.00                                       | mp-1067                                 | 0.34                    |
|          | Li <sub>3</sub> Al <sub>2</sub>  | -2.83                                       | mp-16506                                | 0.31                    |
|          | Li <sub>9</sub> Al <sub>4</sub>  | -2.62                                       | mp-568404                               | 0.21                    |
| Li-Si    | Li <sub>7</sub> Si <sub>3</sub>  | -3.21                                       | mp-1201871                              | 0.35                    |
|          | Li <sub>13</sub> Si <sub>4</sub> | -2.97                                       | mp-672287                               | 0.30                    |
|          | Li <sub>15</sub> Si <sub>4</sub> | -2.87                                       | mp-569849                               | 0.28                    |
|          | Li <sub>21</sub> Si <sub>5</sub> | -2.79                                       | mp-29720                                | 0.25                    |
| Li-Al-Si | LiAlSi                           | -3.88                                       | mp-3161                                 | 0.55                    |
